# Supplementary material for: Fruit and Vegetable Knowledge and Intake within an Australian Population: The AusDiab Study
Source: MDPI journal article supplement (doi:10.3390/nu12123628), 2020-11-25
Supplement: s1 [file s1]

**Table S1.** Baseline characteristics by category of fruit knowledge and vegetable knowledge.

| Characteristics                       | Baseline Knowledge of Fruit Intake |               |               | Baseline Knowledge of Vegetable Intake |               |               |
|---------------------------------------|------------------------------------|---------------|---------------|----------------------------------------|---------------|---------------|
|                                       | Adequate                           | Insufficient  | Poor          | Adequate                               | Insufficient  | Poor          |
| <i>n</i> (%)                          | 3,754 (42.6)                       | 5,031 (55.6)  | 181 (1.8)     | 2,775 (32.2)                           | 6,032 (65.9)  | 159 (1.9)     |
| Sex (men), <i>n</i> (%)               | 1,277 (39.5)                       | 2,652 (57.2)  | 114 (69.5)    | 832 (36.0)                             | 3,102 (56.0)  | 109 (68.5)    |
| Age groups, <i>n</i> (%)              |                                    |               |               |                                        |               |               |
| 25–45 years                           | 1,424 (50.4)                       | 1,645 (45.6)  | 58 (51.2)     | 1,285 (59.6)                           | 1,783 (41.9)  | 59 (50.8)     |
| 45–65 years                           | 1,746 (34.4)                       | 2,368 (37.0)  | 74 (28.4)     | 1,225 (31.6)                           | 2,901 (38.0)  | 62 (26.9)     |
| >65 years                             | 584 (15.1)                         | 1,018 (17.4)  | 49 (20.4)     | 265 (8.9)                              | 1348 (20.1)   | 38 (22.2)     |
| BMI groups                            |                                    |               |               |                                        |               |               |
| Underweight                           | 38 (1.1)                           | 45 (0.7)      | 2 (5.8)       | 23 (1.3)                               | 61 (0.8)      | 1 (0)         |
| Normal                                | 1,428 (40.9)                       | 1,791 (38.4)  | 50 (34.4)     | 1,116 (42.2)                           | 2,110 (38.3)  | 43 (31.0)     |
| Overweight                            | 1,413 (37.6)                       | 2,115 (40.6)  | 93 (42.5)     | 990 (35.7)                             | 2,555 (41.1)  | 76 (38.9)     |
| Obese                                 | 875 (20.4)                         | 1,080 (20.3)  | 36 (17.3)     | 646 (20.8)                             | 1,306 (19.7)  | 39 (30.0)     |
| Energy intake (MJ/day), mean $\pm$ SD | 8.6 $\pm$ 3.0                      | 8.9 $\pm$ 3.1 | 9.2 $\pm$ 4.0 | 8.6 $\pm$ 3.0                          | 8.8 $\pm$ 3.1 | 9.1 $\pm$ 3.2 |
| Physical activity, <i>n</i> (%)       |                                    |               |               |                                        |               |               |
| Sedentary                             | 564 (14.2)                         | 914 (17.2)    | 45 (12.7)     | 376 (12.2)                             | 1,108 (17.3)  | 39 (24.0)     |
| Insufficient                          | 1,172 (33.4)                       | 1,527 (30.7)  | 62 (42.4)     | 903 (33.1)                             | 1,819 (31.6)  | 39 (30.6)     |
| Sufficient                            | 2,018 (52.4)                       | 2,590 (52.1)  | 74 (44.9)     | 1,496 (54.7)                           | 3,105 (51.1)  | 81 (45.4)     |
| Relationship status, <i>n</i> (%)     |                                    |               |               |                                        |               |               |
| Married                               | 2,734 (72.5)                       | 3,644 (72.8)  | 117 (68.7)    | 2,054 (72.0)                           | 4,329 (72.9)  | 112 (71.2)    |
| De facto                              | 180 (4.6)                          | 242 (4.6)     | 12 (2.8)      | 153 (5.3)                              | 272 (4.1)     | 9 (5.5)       |
| Separated                             | 95 (3.3)                           | 127 (1.7)     | 6 (3.3)       | 75 (3.3)                               | 147 (1.9)     | 6 (4.3)       |
| Divorced                              | 239 (5.4)                          | 279 (4.9)     | 16 (6.7)      | 152 (5.0)                              | 374 (5.3)     | 8 (2.3)       |
| Widowed                               | 212 (4.7)                          | 333 (5.9)     | 14 (3.7)      | 105 (3.1)                              | 440 (6.3)     | 14 (10.2)     |
| Single                                | 294 (9.6)                          | 406 (10.2)    | 16 (14.9)     | 236 (11.3)                             | 470 (9.5)     | 10 (6.4)      |
| Level of education, <i>n</i> (%)      |                                    |               |               |                                        |               |               |
| Never to some high school             | 1,396 (32.9)                       | 2,096 (38.0)  | 94 (42.3)     | 897 (30.3)                             | 2606 (38.2)   | 83 (51.5)     |

|                                              |              |              |            |              |              |            |
|----------------------------------------------|--------------|--------------|------------|--------------|--------------|------------|
| Completed university or equivalent           | 2,358 (67.1) | 2,935 (62.0) | 87 (57.7)  | 1,878 (69.7) | 3,426 (61.8) | 76 (48.5)  |
| SEIFA Disadvantage, <i>n</i> (%)             |              |              |            |              |              |            |
| Quartile 1 (least)                           | 1,179 (36.5) | 1,426 (34.4) | 29 (24.1)  | 897 (36.7)   | 1,711 (34.7) | 26 (22.6)  |
| Quartile 2                                   | 1,492 (35.0) | 1,950 (34.1) | 59 (25.4)  | 1,166 (36.0) | 2,275 (33.7) | 60 (31.1)  |
| Quartile 3                                   | 575 (16.1)   | 818 (15.9)   | 44 (20.5)  | 389 (15.8)   | 1,008 (15.9) | 40 (26.6)  |
| Quartile 4 (most)                            | 508 (12.4)   | 837 (15.6)   | 49 (30.0)  | 323 (11.5)   | 1,038 (15.8) | 33 (19.7)  |
| Smoking status, <i>n</i> (%)                 |              |              |            |              |              |            |
| Current                                      | 419 (11.3)   | 902 (18.6)   | 45 (31.6)  | 316 (11.7)   | 1,013 (17.3) | 37 (31.4)  |
| Former smoker                                | 1,087 (26.6) | 1,484 (25.2) | 57 (26.2)  | 787 (25.6)   | 1,786 (25.8) | 55 (32.4)  |
| Non-smoker                                   | 2,248 (62.1) | 2,645 (56.1) | 79 (42.2)  | 1,672 (62.7) | 3,233 (57.0) | 67 (36.2)  |
| Self-reported CVD history, Yes, <i>n</i> (%) | 234 (5.8)    | 462 (7.4)    | 22 (9.2)   | 130 (4.0)    | 573 (7.8)    | 15 (16.0)  |
| Diabetes status, <i>n</i> (%)                |              |              |            |              |              |            |
| Normal glucose levels                        | 2860 (79.3)  | 3643 (75.5)  | 117 (64.2) | 2209 (82.0)  | 4305 (74.6)  | 106 (71.8) |
| Known Diabetes Mellitus                      | 130 (3.5)    | 213 (3.2)    | 14 (6.0)   | 77 (2.7)     | 272 (3.7)    | 8 (5.3)    |
| Impaired fasting glucose                     | 187 (4.5)    | 331 (6.7)    | 16 (9.8)   | 132 (5.0)    | 385 (6.1)    | 17 (9.2)   |
| Impaired glucose tolerance                   | 443 (9.9)    | 622 (10.6)   | 23 (17.0)  | 283 (8.6)    | 787 (11.4)   | 18 (9.3)   |
| New Diabetes Mellitus                        | 134 (2.8)    | 222 (4.1)    | 11 (3.1)   | 74 (1.8)     | 283 (4.3)    | 10 (4.5)   |

All *n* values are the number of observations, weighted using survey command. Baseline fruit knowledge and baseline vegetable knowledge scores: Poor defined as <20, Insufficient as 20, Adequate as 25; BMI body mass index; Underweight defined as <18.5 kg/m<sup>2</sup>; Normal as 18.5–24.9 kg/m<sup>2</sup>; Overweight as ≥25 kg/m<sup>2</sup> and Obese as ≥30 kg/m<sup>2</sup>; Physical activity levels defined as Sedentary nil physical activity time, Insufficient as <150 minutes/week and Sufficient as >150 minutes/week; SEIFA Disadvantage scores defined as Quartile 1 as >1068 (least disadvantaged), Quartile 2 as 1068 – 990, Quartile 3 as 989 – 928 and Quartile 4 as <928 (most disadvantaged); MJ megajoules; CVD cardiovascular disease.

**Table S2.** Relationship of the demographic and lifestyle factors in our adjusted model investigating the association of baseline fruit knowledge and baseline vegetable knowledge scores with respective baseline fruit and vegetable intakes (grams/day).

| Characteristics          | Baseline Fruit Intake (grams/day) |                         | Baseline Vegetable Intake (grams/day) |                |
|--------------------------|-----------------------------------|-------------------------|---------------------------------------|----------------|
|                          | Model 2 <sup>b</sup>              | Coefficient<br>(95% CI) | Coefficient<br>(95% CI)               |                |
| Baseline Knowledge Score |                                   |                         |                                       |                |
| Adequate                 | reference                         |                         | reference                             |                |
| Insufficient             | −65.3                             | (−73.3, −57.3)          | −16.1                                 | (−26.4, −5.8)  |
| Poor                     | −96.7                             | (−126.9, −66.4)         | −58.9                                 | (−77.6, −40.2) |
| Sex                      |                                   |                         |                                       |                |
| Male                     | reference                         |                         | reference                             |                |
| Female                   | 13.9                              | (5.8, 21.9)             | 8.0                                   | (0.7, 15.3)    |
| Age Groups               |                                   |                         |                                       |                |
| 25–45 years              | reference                         |                         | reference                             |                |
| 45–65 years              | 40.4                              | (26.7, 54.1)            | 17.1                                  | (8.5, 25.8)    |
| >65 years                | 53.0                              | (33.5, 72.4)            | 27.1                                  | (17.2, 37.1)   |
| BMI Groups               |                                   |                         |                                       |                |
| Normal                   | reference                         |                         | reference                             |                |
| Underweight              | −37.9                             | (−76.8, 1.0)            | −1.5                                  | (−32.2, 29.1)  |
| Overweight               | −3.3                              | (−10.8, 4.3)            | 4.3                                   | (−4.0, 12.6)   |
| Obese                    | 0.9                               | (−15.6, 17.3)           | 7.8                                   | (−1.4, 16.9)   |
| Energy Intake (MJ/day)   | 8.5                               | (7.2, 9.8)              | 9.1                                   | (7.8, 10.3)    |
| Physical Activity Level  |                                   |                         |                                       |                |
| Sedentary                | reference                         |                         | reference                             |                |
| Insufficient             | 0.0                               | (−18.7, 18.8)           | 1.5                                   | (−6.5, 9.5)    |
| Sufficient               | 24.2                              | (11.7, 36.8)            | 9.0                                   | (1.4, 16.6)    |
| Marital Status           |                                   |                         |                                       |                |
| Married                  | reference                         |                         | reference                             |                |
| De facto                 | −19.9                             | (−37.3, −2.5)           | 6.5                                   | (−8.0, 20.9)   |
| Separated                | −18.2                             | (−45.5, 9.1)            | −1.1                                  | (−18.3, 16.1)  |
| Divorced                 | −18.0                             | (−39.5, 3.4)            | 0.4                                   | (−11.8, 12.7)  |
| Widowed                  | 5.0                               | (−24.0, 34.1)           | −13.6                                 | (−23.4, −3.7)  |

|                              |           |               |           |               |
|------------------------------|-----------|---------------|-----------|---------------|
| Single                       | 3.0       |               | −3.8      | (−16.3, 8.6)  |
| Education Level              |           |               |           |               |
| Never to some high school    | reference |               | reference |               |
| University or equivalent     | 2.1       | (−5.4, 9.6)   | −11.9     | (−17.5, −6.2) |
| SEIFA Disadvantage           |           |               |           |               |
| Quartile 1 (least)           | reference |               | reference |               |
| Quartile 2                   | −4.4      | (−21.0, 12.1) | 3.5       | (−7.5, 14.4)  |
| Quartile 3                   | −1.7      | (−22.2, 18.9) | 9.7       | (−11.5, 30.9) |
| Quartile 4 (most)            | 9.6       | (0.1, 19.2)   | 1.9       | (−28.0, 31.8) |
| Smoking Status               |           |               |           |               |
| Current smoker               | reference |               | reference |               |
| Former smoker                | 43.9      | (28.0, 59.7)  | 12.2      | (0.5, 23.8)   |
| Non-smoker                   | 53.2      | (35.9, 70.5)  | 10.2      | (0.0, 20.3)   |
| Self-reported history of CVD |           |               |           |               |
| Yes                          | reference |               | reference |               |
| No                           | −6.3      | (−25.7, 13.1) | −12.9     | (−19.5, −6.2) |
| Diabetes Status              |           |               |           |               |
| Normal glucose levels        | reference |               | reference |               |
| Known Diabetes Mellitus      | 24.4      | (−5.8, 54.6)  | 6.5       | (−5.8, 18.7)  |
| New Diabetes Mellitus        | 3.6       | (−24.9, 32.2) | −8.7      | (−24.5, 7.0)  |
| Impaired fasting glucose     | 5.0       | (−10.6, 20.6) | −1.9      | (−16.3, 12.5) |
| Impaired glucose tolerance   | −8.7      | (−23.8, 6.4)  | −2.3      | (−14.0, 9.4)  |

CI: confidence interval. <sup>b</sup> Results are presented as coefficient (95% CI) estimated using survey command for linear regression, adjusted for age, sex, BMI, energy intake, relationship status, physical activity, level of education, SEIFA (Socio-economic index for areas) disadvantage, smoking status, diabetes status and self-reported history of cardiovascular disease. Baseline fruit knowledge score: Poor defined as <20, Insufficient 20, and Adequate as 25. Baseline vegetable knowledge score: Poor defined as <20, Insufficient 20, and Adequate as 25. Physical activity levels defined as: Sedentary nil physical activity time, Insufficient as <150 minutes/week and Sufficient as >150 minutes/week; SEIFA disadvantage scores defined as Quartile 1 as >1068 (least disadvantaged), Quartile 2 as 1068 – 990, Quartile 3 as 989 – 928, and Quartile 4 as <928 (most disadvantaged); BMI body mass index; Underweight defined as <18.5 kg/m<sup>2</sup>, Normal as 18.5–24.9 kg/m<sup>2</sup>, Overweight as ≥25 kg/m<sup>2</sup> and Obese as ≥30 kg/m<sup>2</sup>; MJ megajoules; CVD cardiovascular disease.
